1 Bacterial produce membrane-binding small molecules to regulate horizontal gene  
2 transfer in vesicles

3  
4  
5 Frances Tran<sup>1,#</sup>, Manasi S. Gangan<sup>2,#</sup>, and James Q. Boedicker<sup>1,2</sup>

6  
7 <sup>1</sup> University of Southern California, Department of Biological Sciences

8 <sup>2</sup> University of Southern California, Department of Physics and Astronomy

9  
10 University of Southern California  
11 Seaver Science Center (SSC) 212  
12 920 Bloom Walk  
13 Los Angeles, CA 90089

14  
15 Co-first Authors:

16 Frances Tran  
17 [francest@usc.edu](mailto:francest@usc.edu)

18  
19 Manasi S. Gangan  
20 [mgangan@usc.edu](mailto:mgangan@usc.edu)

21  
22 # Frances Tran and Manasi S. Gangan contributed equally to this work. Author order  
23 was determined in order of increasing seniority.

24  
25 Corresponding Author:

26 James Q. Boedicker  
27 [boedicke@usc.edu](mailto:boedicke@usc.edu)  
28 (213)740-1104

29  
30 **Abstract**

31  
32 The exchange of bacterial extracellular vesicles facilitates molecular exchange between  
33 cells, including the horizontal transfer of genetic material. Given the implications of such  
34 transfer events on cell physiology and adaptation, some bacterial cells have likely  
35 evolved mechanisms to regulate vesicle exchange. Past work has identified  
36 mechanisms that regulate the formation of extracellular vesicles, including the  
37 production of small molecules that modulate membrane structure, however whether  
38 these mechanisms also regulate vesicle uptake and have an overall impact on the rate  
39 of vesicle exchange is unknown. Here we show that membrane-binding molecules  
40 produced by microbes regulate both the formation and uptake of extracellular vesicles  
41 and have the overall impact of increasing the vesicle exchange rate within a bacterial  
42 coculture. In effect, production of compounds that influence vesicle exchange rates  
43 enable cells to steal genes from neighboring cells. The ability of several membrane-  
44 binding compounds to regulate vesicle exchange was demonstrated. Three of these  
45 compounds, nisin, colistin, and polymyxin B, are antimicrobial peptides added at sub-  
46 inhibitory concentrations. These results suggest that a key function of exogenous  
47 compounds that bind to membranes may be the regulation of vesicle exchange between  
48 cells.

## 52 **Importance**

53

54 The exchange of bacterial extracellular vesicles is one route of gene transfer between  
55 bacteria, although it was unclear if bacteria developed strategies to regulate the rate of  
56 gene transfer within vesicles. In eukaryotes, there are many examples of specialized  
57 molecules that have evolved to facilitate the production, loading, and uptake of vesicles.  
58 Recent work with bacteria has shown that some small molecules influence membrane  
59 curvature and induce vesicle formation. Here we show that similar compounds facilitate  
60 vesicle uptake, thereby regulating the overall rate of vesicle exchange within bacterial  
61 populations. The addition of membrane-binding compounds, several of them antibiotics  
62 at sub-inhibitory concentrations, to a bacterial co-culture increased the rate of horizontal  
63 gene transfer via vesicle exchange.

64

65

## 66 **Introduction**

67

68 Many biomolecules are exchanged via bacterial extracellular vesicles. Bacterial vesicles  
69 are known to contain cytoplasmic and membrane proteins, genetic material, and small  
70 molecules including bacterial signaling molecules. The uptake of vesicles enables  
71 molecular transfer between different species of bacteria and from bacteria to eukaryotic  
72 host cells (1-6). Vesicle exchange contributes to horizontal gene transfer within bacterial  
73 populations (7-10). Although many mechanisms have been shown to regulate bacterial  
74 vesicle formation (11-19), less is known about mechanisms cells use to control the  
75 exchange of vesicles, which involves both the production of vesicles by a donor cell and  
76 the uptake of vesicles by a recipient cell. Given the importance of vesicle exchange to  
77 many cellular processes and the ubiquity of vesicle production by many bacterial species  
78 (20, 21), it seems likely that bacteria would have evolved strategies to elicit and control  
79 vesicle exchange.

80

81 More is known about regulation of vesicle exchange within eukaryotic systems.  
82 Eukaryotic vesicles are essential to signal transmission within neuronal synapses and  
83 also involved in immune regulation and angiogenesis (22-26). Vesicle formation and  
84 uptake both require restructuring the membrane and the formation of energetically costly  
85 intermediate states of the membrane (27-29). Eukaryotic cells overcome these energy  
86 barriers through the use of molecular motors and membrane-restructuring molecules to  
87 induce membrane curvature (30-32). Similar strategies have been shown in bacteria,  
88 with the best example being regulation of vesicle production via pseudomonas quinolone  
89 signal (PQS) (11). PQS inserts into the bacterial membrane, inducing curvature and  
90 leading to increased vesicle production (11, 14, 33). PQS production can also induce  
91 vesicle formation in neighboring species (5). Other membrane-binding compounds have  
92 been shown to influence vesicle production, including polymyxin B, colistin, and phenol-  
93 soluble modulins (34-36). These reports show that as in eukaryotic cells, vesicle  
94 production by bacteria can be regulated by molecules that bind to and restructure the  
95 cell membrane.

96

97 It is not known if molecules that restructure the cell membrane also influence vesicle  
98 uptake by bacteria, and if the presence of such molecules impacts the overall rate of  
99 vesicle exchange within a population of bacteria. Here we test the influence of several  
100 membrane-restructuring compounds on the rate of vesicle production and vesicle uptake  
101 to determine the extent that vesicle exchange can be regulated via exogenous  
102 compounds. Vesicle uptake was quantified through the vesicle-mediated transfer of

103 plasmid DNA and the resulting gain of antibiotic resistance in the recipient population  
104 (10). These results demonstrate that exogenous bacterial compounds that are known to  
105 bind to and restructure the cell membrane regulate vesicle exchange within bacterial  
106 populations.

107

## 108 **Results**

### 109 **Membrane structuring protein alpha-synuclein regulates the production and** 110 **uptake of extracellular vesicles in bacteria.**

111

112 In eukaryotic systems, the production and uptake of vesicles is regulated by many  
113 mechanisms. One mechanism for EV biogenesis in eukaryotic systems includes  
114 recruitment of ESCRT (endosomal sorting complexes required for transport) complexes  
115 and their interaction with the membrane and many other factors (37, 38). As for EV  
116 uptake in eukaryotic systems, EV binding and uptake can be regulated by transmitted  
117 signals from the cell surface to elicit uptake (39). As vesicle exchange in bacterial cells  
118 could also involve restructuring and reshaping the cell membrane, we sought to  
119 determine if biomolecules known to interact with cell membrane would regulate  
120 exchange of bacterial vesicles. Initial experiments examined the influence of the well-  
121 characterized human protein, alpha-synuclein (AS), on vesicle formation and uptake. AS  
122 binds to membranes and is found in high abundance in presynaptic terminal associated  
123 with synaptic vesicles (40-42). Alpha-synuclein binds to curved, anionic lipids (43). In  
124 addition, previous studies have suggested membranolytic effect of AS on bacterial cell  
125 (44). We speculated that the ability of AS to bind to and restructure cellular membranes,  
126 would translate to modulation of vesicle production and uptake in bacteria at sublethal  
127 concentrations.

128

129 To test the ability of AS to influence vesicle production, concentrations of purified AS  
130 between 0.01  $\mu\text{M}$  and 0.1  $\mu\text{M}$  were added to cultures of *Escherichia coli* MG1655  
131 containing the plasmid pLC-RK2 (10), see Table S1. Vesicles were harvested from  
132 culture after 16-20 h of growth via size-exclusion filtration and ultra-centrifugation, see  
133 Fig 1A. Production of vesicles was measured by quantifying the concentration of outer-  
134 membrane proteins, OmpC/F, in solutions of harvested vesicles via SDS-Polyacrylamide  
135 gel electrophoresis, see Fig S1. As shown in Fig 1B, cultures of the *E. coli* donor strain  
136 grown in AS resulted in 2 to 3 times more vesicle production. AS at 0.1  $\mu\text{M}$  did not  
137 strongly influence cell growth, see Fig S2.

138

139 Next, we tested if these same concentrations of AS would likewise influence the uptake  
140 of vesicles by a recipient strain. The assay for vesicle uptake is depicted in Fig 1A.  
141 Vesicles were harvested from a donor bacterial strain containing a plasmid, and the  
142 harvested vesicles, some containing the plasmid pLC-RK2, were added to a recipient  
143 bacterial strain. Aliquots of the culture of receiver strain with added harvested vesicles  
144 were removed at a set time interval and spread onto antibiotic selection plates. The  
145 plasmid contained a resistance marker, and the recipient strain did not grow on antibiotic  
146 selective plates in the absence of the plasmid. The time needed to detect a recipient cell  
147 with antibiotic resistance was defined as the time to transfer and is proportional to the  
148 rate of successful gene transfer via vesicles. In previous studies, we have shown that  
149 gene transfer in vesicles has a characteristic transfer time that depends on the  
150 concentrations and characteristics of the transferred plasmid, the donor strain, and the  
151 recipient strain (10). Gain of resistance in this assay is the result of the uptake of  
152 plasmids located inside of harvested vesicles, as verified by detection of the transferred

153 plasmid in resistant recipient strains via colony PCR. Vesicles from an *E. coli* MG1655  
 154 donor strain containing plasmid pLC-RK2 were added to the recipient strain, *E. coli*  
 155 MG1655, at early exponential growth phase. In transfer experiments a standard number  
 156 of vesicles was used. Vesicles added to recipient cultures contained a total of 1  $\mu\text{g}$  of the  
 157 outer membrane proteins OmpC/F, quantified via protein gels, see Fig S1. As shown in  
 158 Fig 1C, in the absence of AS gene transfer occurred after 11 h, whereas the time to  
 159 transfer was shortened to 8.5 and 5.5 h after adding 0.01  $\mu\text{M}$  and 0.1  $\mu\text{M}$  AS,  
 160 respectively.

161  
 162  
 163  
 164  
 165  
 166  
 167

Increased vesicle production and uptake rate in the presence of AS suggested that  
 exogenous molecules known to bind to, and restructure cellular membranes have the  
 potential to modulate vesicle exchange between bacterial cells. Next, we tested if this  
 phenomenon was general to other exogenous biomolecules known to interact with outer  
 membranes, specifically compounds naturally released by bacteria.

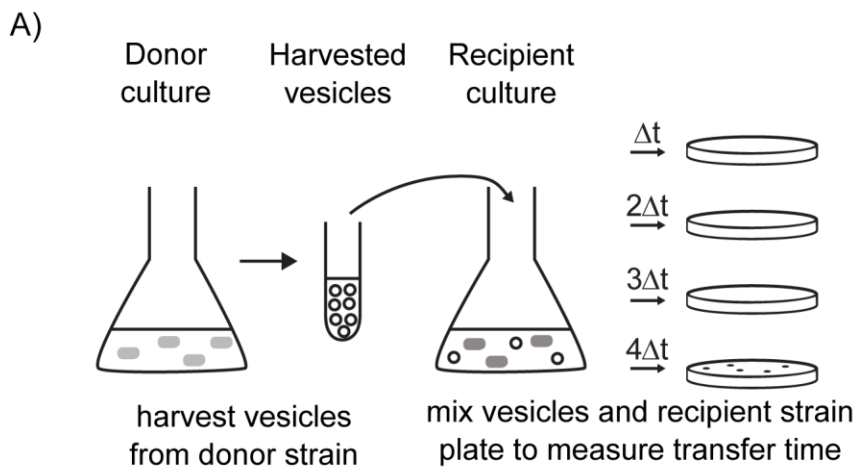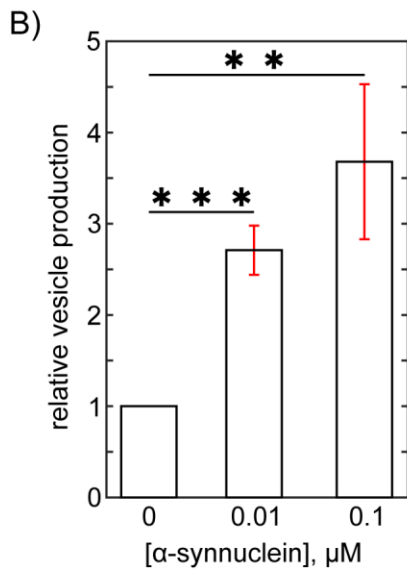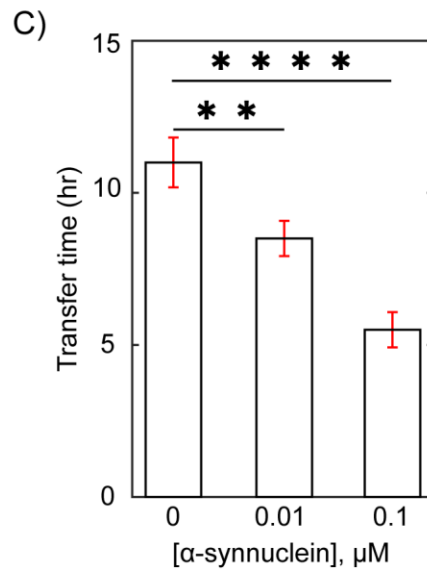

168  
 169  
 170  
 171  
 172

Figure 1: Alpha-synuclein increases the rates of extracellular vesicle (EV) production and uptake. A) EVs were harvested from a donor culture via filtration and centrifugation. The donor strain contained a plasmid conferring antibiotic resistance. Harvested EVs

173 were added to a recipient culture, and EV uptake was monitored by detecting the gain of  
174 resistance in recipient cells. B) Addition of the membrane binding eukaryotic peptide  
175 alpha-synuclein increased the rate of vesicle production by the *E. coli* donor strain in a  
176 dose-dependent manner. C) Addition of alpha-synuclein to the recipient *E. coli* culture  
177 decreased the time to transfer of EVs in a dose-dependent manner. n=3. Error bars  
178 show standard deviation. Significance in the difference observed in vesicle production  
179 and transfer time between treated and untreated samples was confirmed with unpaired t  
180 test (\*\* P ≤ 0.01, \*\*\* P ≤ 0.001, \*\*\*\* P ≤ 0.0001).

181

182

### 183 **Membrane binding exogenous molecules produced by bacteria increased vesicle** 184 **production.**

185

186 Many molecules released by bacteria are known to bind to and restructure cellular  
187 membranes. We hypothesized that like AS, molecules naturally produced by bacteria  
188 that affect membrane structure would modulate rates of vesicle exchange. For example  
189 Pseudomonas quinolone signal (PQS) has been shown to induce membrane curvature  
190 in both *Pseudomonas aeruginosa* and red blood cells and influenced vesicle production  
191 (11, 14). Many other membrane-binding molecules released by bacterial cells have been  
192 characterized, including several molecules known to have antibiotic properties. Like  
193 PQS, the membrane binding antibiotic compounds colistin and polymyxin B (PMB)  
194 increased the rate of vesicle production by bacteria (35).

195

196 Here we measured the influence of membrane-structuring molecules such as colistin,  
197 nisin, PMB and PQS on horizontal gene transfer (HGT) via EVs, as each of these  
198 molecules is known to bind to bacterial membranes, and modulation of membrane shape  
199 was been observed (45-48). Among these, colistin and PMB are known inhibitors of *E.*  
200 *coli* growth. In our tests, concentrations below the reported MIC were used (49, 50), see  
201 Table S2. In Table S2 we define the baseline or 1X concentration used for each  
202 compound tested. As shown in Fig S3A, colistin and PMB at this 1X concentration had a  
203 temporary effect on cell growth, although normal growth resumed after a few hours.  
204 Colistin and PMB increased the number of cells in the population with compromised  
205 membranes, as measured using propidium iodide, but that effect was also transient as  
206 shown in Fig S3B and S3C. PQS does not have MIC reported for *E. coli* cultures and  
207 nisin does not have a well-defined MIC for *E. coli*. Their respective 1X concentrations  
208 were arbitrarily fixed at 10 µg/ml and 20 µg/ml (Table S2). We observed no decrease in  
209 the growth rate or loss of membrane integrity when *E. coli* cultures were treated either  
210 with nisin or with PQS, at 1X concentrations Fig S3. EV production and uptake were  
211 measured in the presence of each compound using the assays described in Fig. 1A. *E.*  
212 *coli* cells were treated with 0.5 µg/mL Bovine serum albumin (BSA) or 1 µM AHL *N*-  
213 butyryl-L-homoserine lactone (C4-AHL) were run as negative controls. Both BSA and  
214 C4-AHL are not known to bind to restructure bacterial membrane, and C4-AHL has been  
215 shown not to influence vesicle production in bacteria (51).

216

217 Vesicle production was measured by quantifying the abundance of outer-membrane  
218 proteins in purified vesicle on SDS-PAGE gel. These measurements were also  
219 compared to nanoparticle tracking analysis which directly counts EVs in solution, Fig S4.  
220 As shown in Fig 2A, Fig S5, all the three antibiotic compounds and PQS positive control  
221 increased vesicle production of the *E. coli* donor strain, similar to previous reports (11,  
222 14, 52). Vesicle production in the presence of these compounds was concentration  
223 dependent, Fig 2B. Even upon treatment with 0.25X relative concentration, a nearly 2-

224 fold increase in vesicle production was observed, demonstrating that even low  
225 concentrations, far below the MIC of colistin and PMB, these compounds have the  
226 potential to influence vesicle production. Vesicle size and morphology were not strongly  
227 affected by these compounds, Fig S6.

228  
229  
230

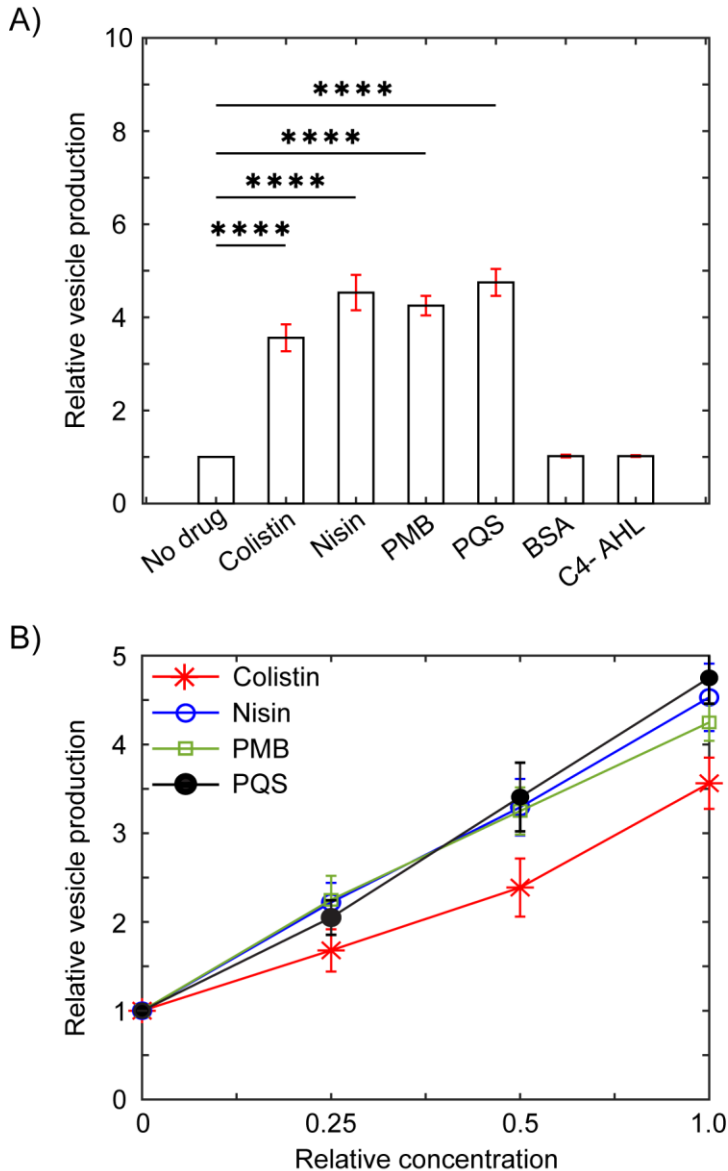

231  
232

233 Figure 2: Membrane-binding compounds produced by bacteria increased vesicle  
234 production. EV production was measured by analyzing the concentration of  
235 characteristic outer membrane proteins (OmpC/F) in harvested EVs. A) Addition of  
236 exogenous molecules increased EV production in a culture of *E. coli*. (B) Vesicle  
237 production increased linearly with increase in drug concentration. 1X relative  
238 concentration for colistin and PMB is 1  $\mu$ g/ml and for nisin and PQS is 10 and 20  $\mu$ g/ml  
239 respectively. Error bars show standard deviation. Difference between the experimental  
240 conditions was validated with unpaired t- test (\*\*\*\*  $P \leq 0.0001$ ).

241  
242  
243  
244  
245  
246  
247  
248  
249  
250  
251  
252  
253  
254  
255  
256  
257  
258  
259  
260  
261  
262  
263

### Bacterial membrane binding compounds increase vesicle uptake in recipient cells.

The induction of membrane curvature is also essential for vesicle fusion and therefore vesicle uptake with recipient cells. As shown in Fig. 1, alpha-synuclein, a molecule known to restructure membranes, influenced vesicle production and uptake. Next, we tested if the four compounds shown to induce vesicle production also increased vesicle uptake. As in Fig. 1, vesicles were harvested from a donor *E. coli* strain containing the plasmid pLC-RK2, which confers kanamycin resistance to the host cells (10). Donor cells were grown in the absence of the membrane-binding compound, although as shown in Fig S7, EV transfer time was not dependent on whether EVs were produced in the presence or absence of membrane-binding compounds. Recipient cells grown to exponential phase were treated for 1 hour with one of the membrane-binding compounds prior to the addition of harvested vesicles. Cells were plated every hour on LB plates with kanamycin to track plasmid transfer. Vesicles harvested from a donor containing pLC-RK2 transferred around 10 hours in the absence of added compound. Uptake in the presence of the 4 membrane-binding molecules tested decreased in transfer time to 5-6 hours, see Fig. 3A. Negative controls showed that 0.5  $\mu\text{g}/\text{mL}$  BSA and 1  $\mu\text{M}$  C4-AHL did not alter the transfer time of the plasmid. The reduction in the uptake time was dependent on the concentration of the added compound, as shown for the case of nisin in Fig. 3B.

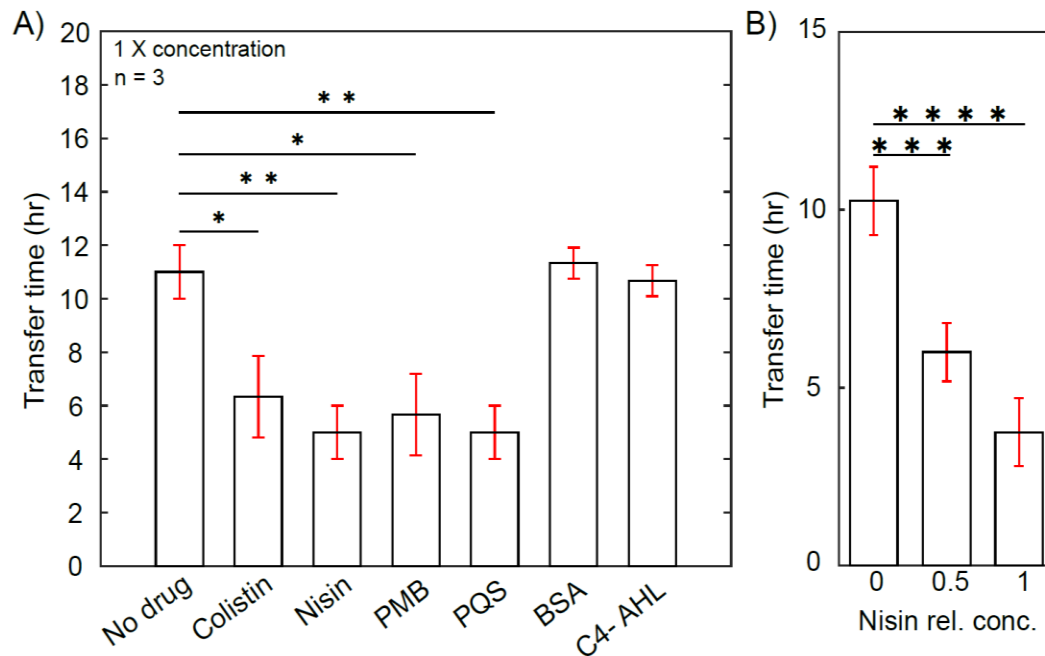

264  
265  
266  
267  
268  
269  
270  
271

Figure 3. Membrane-binding compounds produced by bacteria increase vesicle uptake. Vesicle uptake was quantified as the time needed for recipient cells to gain antibiotic resistance as the result of plasmid transfer via EV uptake. A) Colistin, nisin, polymyxin B(PMB), and Pseudomonas quinolone signal (PQS) signal all increased EV uptake in a culture of *E. coli*. Bovine serum albumin (BSA) and N-butyl-L-Homoserine lactone (C4-AHL) were negative controls. (B) nisin increased EV uptake in a dose dependent manner. Error bars show standard deviation. Unpaired t test was used to confirm the

272 difference between treated and untreated cultures (\*\*  $P \leq 0.01$ , \*\*\*  $P \leq 0.001$ , \*\*\*\*  $P \leq$   
273 0.0001).

274

275

276 **Membrane binding compounds increased the rate of horizontal gene transfer**  
277 **within a bacterial coculture.**

278

279 Given that the EMs tested increase both vesicle production and uptake rates, we next  
280 tested if the addition of these compounds would regulate plasmid exchange within a  
281 bacterial coculture. As shown in Fig. 4A, exponential cultures of *E. coli* strains carrying  
282 different plasmids were mixed together. One strain was *E. coli* MG1655 carrying the  
283 pLC-RK2 plasmid with kanamycin resistance, and the other strain was *E. coli* DH5 $\alpha$   
284 carrying pSC101+ plasmid with ampicillin resistance. Control experiments confirmed that  
285 the plasmids were compatible and could be stably maintained in the same cell (data not  
286 shown). We hypothesized that plasmid exchange within EVs would result in a strain with  
287 resistance to both antibiotics. Strain DH5 $\alpha$  was chosen because its genome contains a  
288 deletion of *lacZ*, enabling discrimination of the direction of gene flow via selection on  
289 MacConkey agar plates, see SI, Fig S8.

290

291 After inoculating the co-culture, 1 ml aliquots were removed every hour and used to  
292 inoculate fresh media with double antibiotic selection. This culture, called the gene  
293 transfer screen in Fig 4a, contained kanamycin at 50  $\mu\text{g/ml}$  and ampicillin at 100  $\mu\text{g/ml}$ ,  
294 therefore only cells containing both resistance markers would proliferate. The fold  
295 change in the optical density at 600 nm after 12 hours in the gene transfer screen was  
296 used to determine whether plasmid exchange had occurred within the initial co-culture  
297 prior to the time of cell passage. As shown in Fig. 4B, in the absence of externally added  
298 membrane binding molecules (condition Strains A+B), cells with double antibiotic  
299 resistance were detected after 9 hours of coculture. For aliquots of co-culture sampled  
300 prior to 9 hours, the optical density of the culture in the presence of both antibiotics  
301 decreased over time, whereas co-culture aliquots taken at 9 hours or later resulted in an  
302 increase in optical density over time. Growth in the gene transfer screen indicated that  
303 the co-culture contained cells with both plasmids at the time of passage. Cells growing  
304 within the gene transfer screen were streaked out to form single colonies on McConkey's  
305 agar plates with kanamycin and ampicillin, as shown in Fig. S9. PCR reactions  
306 confirmed that cell within the colonies contained both resistance genes, as shown in Fig.  
307 S10.

308

309 As shown in Fig 4B and C, in the presence of membrane binding compounds, the time  
310 needed to observe a strain with double antibiotic resistance was decreased from 8 hours  
311 to less than 4 hours. Control experiments confirmed that 1) monocultures of cells with  
312 only one plasmid did not gain double antibiotic resistance, 2) free plasmid added to a  
313 monoculture did not result in gene transfer, and 3) dead cells were incapable of  
314 transferring a plasmid. DNaseI activity within the co-culture also did not significantly  
315 change the time needed for gene transfer, suggesting that the transferred plasmid was  
316 protected from DNA degradation. Plasmid transfer within the coculture was also faster  
317 when treatments were added at 0.25 X concentration, as shown in Fig. S11.

318

319



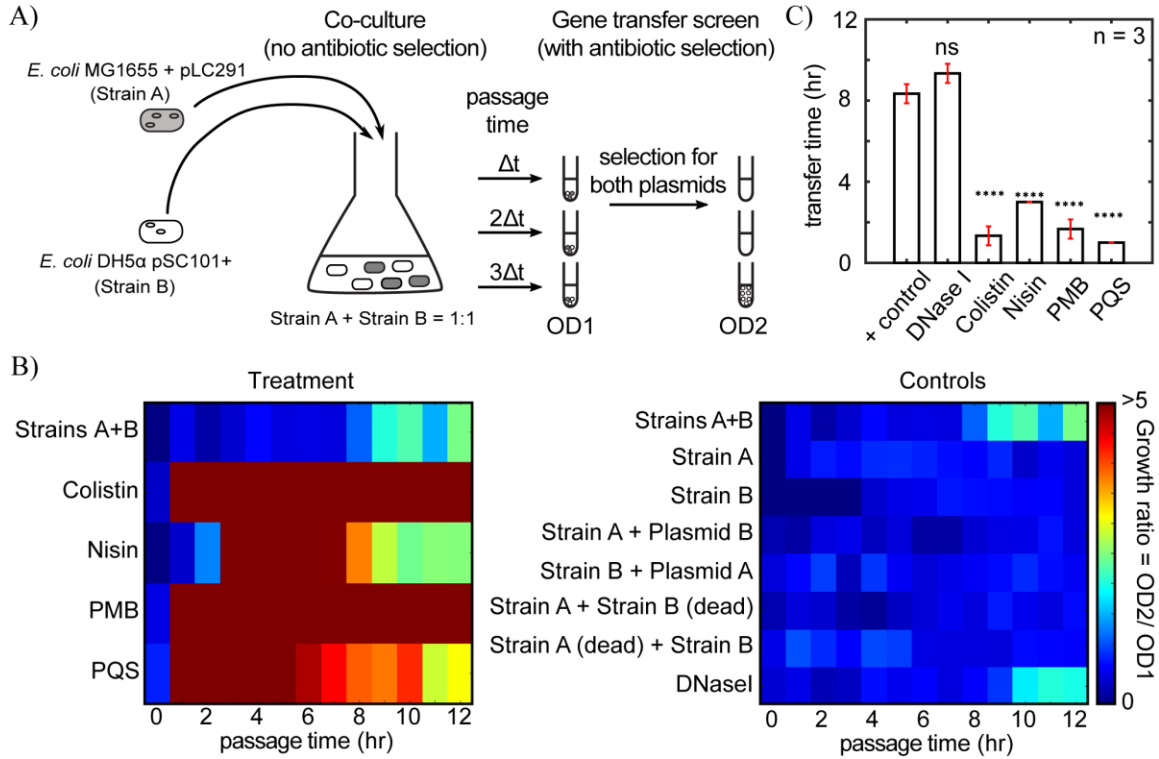

320  
321

322 Figure 4. Membrane-binding molecules increased the rate of horizontal gene transfer  
323 within a bacterial coculture. A) Two strains of *E. coli* harboring plasmids with different  
324 antibiotic resistance genes were cocultured. Over time, aliquots of the co-culture were  
325 used to inoculate media containing both antibiotics to screen for cell containing both  
326 plasmids. OD1 is the optical density of cells at the beginning of the gene transfer screen  
327 and OD2 is the optical density of cells growing in double antibiotic selection after 12 hr.  
328 Growth within the gene transfer screen indicates plasmid exchange within the co-culture  
329 prior to the time of passage. B) The change in optical density within the gene transfer  
330 screen was used to compare the rate of plasmid exchange under a variety of conditions,  
331 with Strains A + B indicating the positive control. Treatments include the addition of  
332 colistin, nisin, PMB, and PQS at the 1X concentration to the co-culture. Controls include  
333 monocultures, monocultures with free plasmid, mixtures of live and dead strains, and  
334 coculture in the presence of DNaseI. C) Transfer times for the positive control, strains A  
335 + strain B, as compared to treatments with membrane binding compounds and the  
336 DNaseI negative control. Error bars indicate standard deviation  
337 Difference between the experimental conditions was validated with unpaired t- test (\*\*\*\*  
338  $P \leq 0.0001$ ).

339

340

### 341 Discussion

342

343 Vesicle exchange is critical to many bacterial processes such as host invasion, signal  
344 exchange, and gene transfer. Vesicle exchange appears to be ubiquitous and is not  
345 known to require specialized molecular machinery for vesicle production or uptake.  
346 It seems likely there would be selection pressure to evolve strategies to regulate vesicle  
347 exchange given its potential to facilitate horizontal gene transfer. The ability of cells to  
348 regulate rates of horizontal gene transfer has been observed previously for other

349 mechanisms of gene transfer (53-57). For example, transformation scales with the  
350 availability of free DNA. Studies have shown that killing neighboring cells increases the  
351 concentration of extracellular DNA and also the rate of transformation (58). Previous  
352 studies have revealed several biological parameters that influence vesicle production,  
353 including modulating membrane composition (13, 59), activation of stress response  
354 pathways (35, 60, 61), destruction of the cell wall, and the production of membrane  
355 structuring molecules (13, 35, 59, 60, 62, 63). It is not surprising that membrane-binding  
356 molecules would influence the production of vesicles, as eukaryotic cell utilize molecules  
357 which wedge, crowd, and bend the membrane to overcome the energetic costs of  
358 vesicle production. Here we showed that membrane-binding molecules produced by  
359 bacteria also increased the rate of vesicle uptake. Some short peptides facilitate  
360 membrane fusion, including fusion peptides and also some antimicrobial peptides (64).  
361 Membrane fusion is promoted through a combination of induction of membrane  
362 curvature, charge screening, anchoring two membranes in juxtaposition, and even  
363 modulation of membrane rupture tension (64). It remains unclear how the bacterial  
364 peptides tested here facilitate membrane fusion.

365  
366 Here we tested the ability of four bacterial compounds, nisin, colistin, PQS, and PMB, to  
367 regulate vesicle exchange. Extensive work on PQS and vesicles has shown the ability of  
368 PQS to induce curvature in membranes through a wedging mechanism, which increased  
369 vesicle production (11, 65). The other compounds are classified as antibiotics, which is  
370 not surprising given that the mode of action for a large number of antibiotics is to  
371 compromise the bacterial membrane. At high concentrations these compounds coat the  
372 cell membrane, eventually forming pores that lead to cell death (66). At low, sub-  
373 inhibitory concentrations, these compounds have secondary functions, including the  
374 regulation of vesicle exchange. Pore formation does not occur at low concentrations of  
375 these molecules (67, 68), instead binding of these compounds leads to membrane  
376 bending and bleb formation, processes known to facilitate vesicle formation (52). Colistin  
377 and PMB were previously shown to induce EV formation, although the previous study  
378 focused on the ability of EVs to protect bacteria from membrane-targeting antibiotic  
379 compounds and phage infection (35). This is not the first time secondary functions have  
380 been identified for antibiotic compounds at sub-lethal concentrations (68). Low  
381 concentrations of fluoroquinolones increased conjugation (69), and sub-inhibitory  
382 concentrations of many antibiotics also act as signaling molecules (67-70). Here we  
383 show that regulation of vesicle exchange, and the associated horizontal gene transfer, is  
384 yet another secondary function of some antibiotic compounds.

385  
386 There are many such membrane binding antibiotic compounds, including colistin, nisin,  
387 and PMB, and the ability of these compounds to influence vesicle production and uptake  
388 does not seem to require a specialized interaction with membrane components. An  
389 unknown component found in the supernatants of *E. coli* and *K. pneumoniae* have been  
390 shown to increase EV production in *P. aeruginosa* (5). Sub-inhibitory concentrations of  
391 gentamicin also destabilize the membrane and induce vesicle formation in *P. aeruginosa*  
392 (71). As shown here, even the eukaryotic compound AS that is involved in membrane  
393 restructuring in neurons has the ability to influence vesicle exchange in bacteria.  
394 Therefore, many if not all membrane binding compounds, including other amphipathic  
395 alpha-helices, may have a regulatory influence on vesicle exchange. Membrane binding  
396 peptides such as antimicrobial peptides are produced by many species of bacteria,  
397 suggesting many bacteria have the potential to regulate vesicle exchange.  
398

399 Recently several mechanisms of vesicle production have been reported (16, 72).  
400 Blebbing is one such mechanism, and the compounds tested here may act through this  
401 pathway given their ability to induce curvature in bacterial membranes (14, 35). Others  
402 have recently speculated that vesicles loaded by DNA are likely the result of cell  
403 explosion (16). It is possible that low concentration of membrane binding antibiotics  
404 contributes to vesicle formation through cell lysis, although it seems unlikely cell lysis  
405 accounts for the increased rate of vesicle uptake. Although many recent studies have  
406 focused on vesicle production, little work has been done on vesicle uptake by bacteria.  
407 The uptake process is essential for the transfer of biomolecules in vesicle, such as  
408 genetic material, membrane proteins, regulatory RNAs, and molecules that mediate  
409 host-bacterial interactions such as LPS (59, 73). Here we showed that compounds  
410 known to restructure the membrane facilitated vesicle uptake, but other mechanisms  
411 might also regulate the vesicle uptake rate. In eukaryotic membranes protein-protein  
412 attachments, such as SNARE proteins, are a first step in endocytosis (29). Some  
413 proteins on vesicle surfaces even insert into the membrane of recipient cells (74).  
414 Recent work suggests uptake of bacterial vesicles into eukaryotic host cells appears to  
415 be rapid (56), although early studies on vesicle uptake via bacteria suggest uptake is a  
416 rare event (75). A better understanding of vesicle uptake and the strategies that bacteria  
417 have evolved to increase the rate of specificity of vesicle uptake, in addition to the  
418 release of membrane structuring molecules, would lead to a better understanding of  
419 vesicle exchange and its regulation within bacterial populations.

420

## 421 **Materials and Methods**

422

423 **Bacterial Strains and Growth Conditions.** *E. coli* lab strain MG1655 was used for all  
424 extracellular vesicle and transfer experiments. DH5 $\alpha$  was also used in coculture  
425 experiments. Bacteria were grown in Luria-Bertani (LB) broth (Difco, Sparks, MD) at  
426 37°C with shaking at 200 rpm. Plasmids were introduced to donor strains via  
427 electroporation. Plasmids were maintained in liquid culture with the appropriate  
428 antibiotics (VWR, Radnor, PA). List of plasmids are in Table S1.

429

430 **Isolation and purification of EVs.** EVs were isolated from liquid cultures of *E. coli*  
431 MG1655 as previously described (10) with some modifications. 400  $\mu$ L of overnight  
432 culture was used to inoculate 400 mL of LB broth containing selective antibiotic and  
433 added exogenous molecule concentration when stated. Liquid cultures were grown at  
434 37°C with shaking at 200 rpm for 16-20 h. Cells were pelleted by centrifugation at 1,200  
435 x g at 4°C for 30 min. The supernatants were decanted, and vacuum filtrated through  
436 ExpressPlus 0.22  $\mu$ m pore-size polyethersulfone (PES) bottle top filter (Millipore,  
437 Billerica, MA) to remove remaining cells and cellular debris. Vesicles were collected by  
438 ultra-centrifugation at 80,000 x g (Ti 45 rotor; Beckman Instruments, Inc., Fullerton, CA)  
439 at 4°C for 1.5-2h followed by 180,000 x g (Ti 70i rotor; Beckman Instruments, Inc.,  
440 Fullerton, CA) at 4°C for 1.5-2h and resuspended in 1mL of phosphate buffered saline  
441 (PBS) and stored at 4°C. Vesicle preparations were treated with 100 ng mL<sup>-1</sup> of DNase I  
442 at 37°C for 20 min followed by deactivation of the DNaseI at 80°C for 10 min. Vesicle  
443 preparations were also plated on LB agar to check for the presence of bacterial cells.

444

445 **EV quantification.** Extracellular vesicle concentrations were quantified using SDS-  
446 Polyacrylamide gel electrophoresis. Vesicle preparations were treated with 6xSDS  
447 loading buffer and boiled for 10 min at 100°C and run on a 10% SDS-PAGE gel (Bio-  
448 Rad Laboratories, Hercules, CA), stained for 15 min with Coomassie Brilliant Blue Stain,  
449 and destained in H<sub>2</sub>O, methanol, and acetic acid (50/40/10 v/v/v) overnight. Protein

450 concentrations of OmpC/F were determined using ImageJ from a standard curve  
451 generated by a BSA protein concentration gradient, as shown in Fig. S1. Protein  
452 concentrations of OmpC/F were used to quantify vesicle concentration and production  
453 relative to untreated cells.

454 **Exogenous molecules used.** Colistin sulfate salt, nisin, polymyxin B sulfate and 2-  
455 Heptyl-3-hydroxy-4(1H)-quinolone (PQS) (Sigma-Aldrich Corp., St. Louis, MO) were  
456 dissolved in water. Purified alpha-synuclein was provided by Ralf Langen's lab at USC  
457 (32).

458

459 **Measurement of bacterial growth.** Overnight grown culture of *E. coli* MG1655 was  
460 used to start parallel cultures treated either with 1 µg/ml colistin or with 10 µg/ml nisin or  
461 with 1 µg/ml PMB or with 20 µg/ml PQS, at 1% inoculum. The growth of all cultures was  
462 monitored in 96- well at 600 nm using plate reader (TECAN, infinite M200PRO) for 12  
463 hrs at 37°C with intermittent shaking for 30 secs.

464

465 **Propidium iodide assay.** 25 ml Secondary cultures of *E. coli* MG1655 were grown at  
466 37°C, 200 rpm till OD reach ~ 0.2, after which individual cultures were subjected to the  
467 treatment with 1 µg/ml colistin or with 10 µg/ml nisin or with 1 µg/ml PMB or with 20  
468 µg/ml PQS. Treated cells were harvested at 0<sup>th</sup>, 2<sup>nd</sup>, 5<sup>th</sup> and 10<sup>th</sup> hours, washed thrice  
469 with 1X PBS and stained with Propidium Iodide Ready Flow™ Reagent (Invitrogen by  
470 Thermo Fisher Scientific) at 25°C. Culture were again washed with 1X PBS and fixed  
471 with 4% PFA. 5 µl of aliquot from these cultures was then spread on the slide and  
472 imaged with 40X/ 0.6 NA objective on ECHO revolve microscope in Phase contrast and  
473 RFP channel.

474

475 **EV-mediated gene transfer.** Gene transfer experiments were modified from previously  
476 published work (10). The *E. coli* recipient strain was diluted 1:1000 from overnight  
477 culture in 4 mL LB broth (Difco, Sparks, MD) at 37°C with shaking at 200 rpm to early log  
478 phase, OD<sub>600</sub> 0.2, ~2 h, and exogenous molecules were added and incubated for 30  
479 mins. Then at time 0 h, purified vesicles were added. The number of vesicles added to  
480 recipient cultures was standardized for transfer experiments. In all transfer assays,  
481 vesicles equivalent to 1 µg of the outer membrane proteins OmpC/F were used. Every  
482 hour, 200 µL of culture was removed and plated on LB agar plates containing either 50  
483 µg mL<sup>-1</sup> kanamycin or 50 µg mL<sup>-1</sup> carbenicillin or both dependent on plasmid resistance.  
484 After 16 h of incubation at 37°C, plates were counted and scored for CFUs. The bacterial  
485 colonies that acquired antibiotic resistance were re-selected on antibiotic selection plates  
486 and the presence of the transferred plasmid was verified for several colonies using PCR.  
487 Gain of resistance not associated with plasmid transfer was not observed.

488 **EV coculture gene transfer.** Coculture experiments were performed using DH5α  
489 ( $\Delta lacZ$ ) cells transformed with pSC101+ (*bla*) and MG1655 (with *lacZ*) transformed with  
490 pLC-RK2 (*npr*). Each strain was grown separately starting in overnight cultures and  
491 mixed together in 1 : 1 proportion next day. The resultant inoculum was added to fresh  
492 100 ml LB at 1% inoculum and grown at 37°C with shaking at 200 rpm for another 12  
493 hours. 1 ml samples withdrawn periodically after every hour from the coculture were  
494 washed thrice with 1X PBS and inoculated in 10 ml LB containing ampicillin (100 µg/ml)  
495 and kanamycin (50 µg/ml). Optical densities of these cultures were recorded for all 13  
496 time points (*SPECTRONIC 200*, Thermo Fisher Scientific) and denoted as OD1. This

497 was followed by incubation of cultures at 37°C and 200 rpm approximately for 12 hrs and  
498 measured for changes in respective optical densities (OD2). Ratio of OD2 to OD1 was  
499 used to determine if growth occurred in the presence of selection for both resistance  
500 markers. Growth indicated the presence of cells harboring both plasmids, as confirmed  
501 by PCR (Fig S10). Cultures at time points with ratio above 1 were streaked on  
502 MacConkey's agar (Sigma- Aldrich) containing ampicillin and kanamycin to differentiate  
503 between the two hosts.

504 **Transmission electron microscopy.** Transmission electron microscopy specimens  
505 were prepared on carbon-coated formvar grids (Electron Microscopy Sciences, Hatfield,  
506 PA). Samples were absorbed on the grids for 5 m and then negatively stained with 1%  
507 (w/v) aqueous uranyl acetate. Images were taken on a JEOL 1400 transmission electron  
508 microscope (JEOL USA Inc., Peabody, MA) at an accelerating voltage of 100kV.

509 **Nanoparticle tracking analysis (NTA).** Malvern Panalytical Nanosight NS300 was  
510 used (Malvern, UK) equipped with a 532 nm green laser. All samples were diluted in  
511 PBS to a final volume of 1 mL. For each measurement, five 1-min videos were captured  
512 with detection threshold of 5, embedded laser, 45 mW. After capture, videos were  
513 analysed by the in-build Nanosight Software NTA 3.1 Build 3.1.46.

514  
515 **Colony PCR.** PCR was performed using colonies from transfer assays using *OneTaq*  
516 (New England BioLabs Inc., Ipswich, MA). Briefly, the reaction mixtures consisted of  
517 0.5 µl of bacterial colony resuspended in H<sub>2</sub>O, 0.2 µM primers, and 1 U of *OneTaq*  
518 polymerase (New England BioLabs Inc., Ipswich, MA) in a final volume of 25 µl. The  
519 program consisted of 25 cycles of denaturing at 94°C for 30 s, annealing at 60°C for  
520 60 s, and extension at 68°C for 30 s. Primers used for pLC-RK2 were: forward-5'  
521 CATTGCGATTGCGCCTGAG 3'; reverse- 5' TCAACGGGAAACGTCTTGCT 3';  
522 pSC101: forward- 5' AGTGATAACACTGCGGCCAA 3'; reverse- 5'  
523 TGAGGCACCTATCTCAGCGA 3'.

## 524 525 **Acknowledgements**

526  
527 We would like to thank Ralf Langen's lab for providing the purified sample of alpha-  
528 synuclein and for help with Transmission electron microscopy, Paolo Neviani and the  
529 ExtraCellular Vesicle Core at Children's Hospital Los Angeles for help with nanoparticle  
530 analysis, and Carla Vidal Silva for helpful discussion and preliminary work on this  
531 project. JB and FT acknowledge funding from NSF award MCB-1818341, NSF award  
532 PHY-1753268, Army Research Office MURI Award W911NF1910269.

## 533 534 **References**

- 535  
536 1. Kim J-Y, Doody AM, Chen DJ, Cremona GH, Shuler ML, Putnam D, DeLisa MP.  
537 2008. Engineered bacterial outer membrane vesicles with enhanced  
538 functionality. *Journal of molecular biology* 380:51-66.  
539 2. Berleman J, Auer M. 2013. The role of bacterial outer membrane vesicles for  
540 intra - and interspecies delivery. *Environmental microbiology* 15:347-354.  
541 3. Bonnington K, Kuehn M. 2014. Protein selection and export via outer  
542 membrane vesicles. *Biochimica et Biophysica Acta (BBA)-Molecular Cell*  
543 *Research* 1843:1612-1619.

- 544 4. Pathirana RD, Kaparakis - Liaskos M. 2016. Bacterial membrane vesicles:  
545 biogenesis, immune regulation and pathogenesis. *Cellular microbiology*  
546 18:1518-1524.
- 547 5. Horspool AM, Schertzer JW. 2018. Reciprocal cross-species induction of outer  
548 membrane vesicle biogenesis via secreted factors. *Scientific reports* 8:1-12.
- 549 6. Kuehn MJ, Kesty NC. 2005. Bacterial outer membrane vesicles and the host-  
550 pathogen interaction. *Genes & development* 19:2645-2655.
- 551 7. Yaron S, Kolling GL, Simon L, Matthews KR. 2000. Vesicle-mediated transfer  
552 of virulence genes from *Escherichia coli* O157: H7 to other enteric bacteria.  
553 *Applied and environmental microbiology* 66:4414-4420.
- 554 8. Rumbo C, Fernández-Moreira E, Merino M, Poza M, Mendez JA, Soares NC,  
555 Mosquera A, Chaves F, Bou G. 2011. Horizontal transfer of the OXA-24  
556 carbapenemase gene via outer membrane vesicles: a new mechanism of  
557 dissemination of carbapenem resistance genes in *Acinetobacter baumannii*.  
558 *Antimicrobial agents and chemotherapy* 55:3084-3090.
- 559 9. Ho M-H, Chen C-H, Goodwin JS, Wang B-Y, Xie H. 2015. Functional advantages  
560 of *Porphyromonas gingivalis* vesicles. *PloS one* 10:e0123448.
- 561 10. Tran F, Boedicker JQ. 2017. Genetic cargo and bacterial species set the rate of  
562 vesicle-mediated horizontal gene transfer. *Scientific reports* 7:1-10.
- 563 11. Schertzer JW, Whiteley M. 2012. A bilayer-couple model of bacterial outer  
564 membrane vesicle biogenesis. *MBio* 3:e00297-11.
- 565 12. Perez-Cruz C, Carri n O, Delgado L, Martinez G, Lopez-Iglesias C, Mercade E.  
566 2013. New type of outer membrane vesicle produced by the Gram-negative  
567 bacterium *Shewanella vesiculosa* M7T: implications for DNA content. *Applied*  
568 *and environmental microbiology* 79:1874-1881.
- 569 13. Schwechheimer C, Kulp A, Kuehn MJ. 2014. Modulation of bacterial outer  
570 membrane vesicle production by envelope structure and content. *BMC*  
571 *microbiology* 14:1-13.
- 572 14. MacDonald IA, Kuehn MJ. 2013. Stress-induced outer membrane vesicle  
573 production by *Pseudomonas aeruginosa*. *Journal of bacteriology* 195:2971-  
574 2981.
- 575 15. Devos S, Van Putte W, Vitse J, Van Driessche G, Stremersch S, Van Den Broek  
576 W, Raemdonck K, Braeckmans K, Stahlberg H, Kudryashev M. 2017.  
577 Membrane vesicle secretion and prophage induction in multidrug - resistant  
578 *Stenotrophomonas maltophilia* in response to ciprofloxacin stress.  
579 *Environmental microbiology* 19:3930-3937.
- 580 16. Turnbull L, Toyofuku M, Hynen AL, Kurosawa M, Pessi G, Petty NK, Osvath  
581 SR, Cárcamo-Oyarce G, Gloag ES, Shimoni R. 2016. Explosive cell lysis as a  
582 mechanism for the biogenesis of bacterial membrane vesicles and biofilms.  
583 *Nature communications* 7:1-13.
- 584 17. Bernadac A, Gavioli M, Lazzaroni J-C, Raina S, Llobès R. 1998. *Escherichia*  
585 *coli* tol-pal mutants form outer membrane vesicles. *Journal of bacteriology*  
586 180:4872-4878.
- 587 18. Roier S, Zingl FG, Cakar F, Durakovic S, Kohl P, Eichmann TO, Klug L,  
588 Gadermaier B, Weinzerl K, Prassl R. 2016. A novel mechanism for the

- 589 biogenesis of outer membrane vesicles in Gram-negative bacteria. *Nature*  
590 *communications* 7:1-13.
- 591 19. Schwechheimer C, Kuehn MJ. 2015. Outer-membrane vesicles from Gram-  
592 negative bacteria: biogenesis and functions. *Nature reviews microbiology*  
593 13:605-619.
- 594 20. Brown L, Wolf JM, Prados-Rosales R, Casadevall A. 2015. Through the wall:  
595 extracellular vesicles in Gram-positive bacteria, mycobacteria and fungi.  
596 *Nature Reviews Microbiology* 13:620-630.
- 597 21. Kim JH, Lee J, Park J, Ghoo YS. Gram-negative and Gram-positive bacterial  
598 extracellular vesicles, p 97-104. *In* (ed), Elsevier,
- 599 22. Jackman SL, Regehr WG. 2017. The mechanisms and functions of synaptic  
600 facilitation. *Neuron* 94:447-464.
- 601 23. Walter AM, Böhme MA, Sigrist SJ. 2018. Vesicle release site organization at  
602 synaptic active zones. *Neuroscience Research* 127:3-13.
- 603 24. Robbins PD, Dorronsoro A, Booker CN. 2016. Regulation of chronic  
604 inflammatory and immune processes by extracellular vesicles. *The Journal of*  
605 *clinical investigation* 126:1173-1180.
- 606 25. Gai C, Carpanetto A, Deregibus MC, Camussi G. 2016. Extracellular vesicle-  
607 mediated modulation of angiogenesis.
- 608 26. Todorova D, Simoncini S, Lacroix R, Sabatier F, Dignat-George F. 2017.  
609 Extracellular vesicles in angiogenesis. *Circulation research* 120:1658-1673.
- 610 27. Prada I, Meldolesi J. 2016. Binding and fusion of extracellular vesicles to the  
611 plasma membrane of their cell targets. *International journal of molecular*  
612 *sciences* 17:1296.
- 613 28. Peñalva DA, Antollini SS, Ambroggio EE, Aveldaño MI, Fanani ML. 2018.  
614 Membrane restructuring events during the enzymatic generation of  
615 ceramides with very long-chain polyunsaturated fatty acids. *Langmuir*  
616 34:4398-4407.
- 617 29. Adnan M, Islam W, Zhang J, Zheng W, Lu G-D. 2019. Diverse role of SNARE  
618 protein sec22 in vesicle trafficking, membrane fusion, and autophagy. *Cells*  
619 8:337.
- 620 30. Drin G, Antonny B. 2010. Amphipathic helices and membrane curvature.  
621 *FEBS letters* 584:1840-1847.
- 622 31. Kegulian NC, Sankhagowit S, Apostolidou M, Jayasinghe SA, Malmstadt N,  
623 Butler PC, Langen R. 2015. Membrane Curvature-sensing and Curvature-  
624 inducing Activity of Islet Amyloid Polypeptide and Its Implications for  
625 Membrane Disruption\*♦. *Journal of Biological Chemistry* 290:25782-25793.
- 626 32. Varkey J, Isas JM, Mizuno N, Jensen MB, Bhatia VK, Jao CC, Petrlova J, Voss JC,  
627 Stamou DG, Steven AC. 2010. Membrane curvature induction and tubulation  
628 are common features of synucleins and apolipoproteins. *Journal of Biological*  
629 *Chemistry* 285:32486-32493.
- 630 33. Florez C, Raab JE, Cooke AC, Schertzer JW. 2017. Membrane distribution of  
631 the *Pseudomonas* quinolone signal modulates outer membrane vesicle  
632 production in *Pseudomonas aeruginosa*. *MBio* 8:e01034-17.
- 633 34. Schlatterer K, Beck C, Hanzelmann D, Lebtig M, Fehrenbacher B, Schaller M,  
634 Ebner P, Nega M, Otto M, Kretschmer D. 2018. The mechanism behind

- 635 bacterial lipoprotein release: phenol-soluble modulins mediate Toll-like  
636 receptor 2 activation via extracellular vesicle release from *Staphylococcus*  
637 *aureus*. *MBio* 9:e01851-18.
- 638 35. Manning AJ, Kuehn MJ. 2011. Contribution of bacterial outer membrane  
639 vesicles to innate bacterial defense. *BMC microbiology* 11:1-15.
- 640 36. Dupuy FG, Pagano I, Andenoro K, Peralta MF, Elhady Y, Heinrich F, Tristram-  
641 Nagle S. 2018. Selective interaction of colistin with lipid model membranes.  
642 *Biophysical journal* 114:919-928.
- 643 37. D'Souza-Schorey C, Schorey JS. 2018. Regulation and mechanisms of  
644 extracellular vesicle biogenesis and secretion. *Essays in Biochemistry*  
645 62:125-133.
- 646 38. Sedgwick AE, D'Souza - Schorey C. 2018. The biology of extracellular  
647 microvesicles. *Traffic* 19:319-327.
- 648 39. French KC, Antonyak MA, Cerione RA. Extracellular vesicle docking at the  
649 cellular port: Extracellular vesicle binding and uptake, p 48-55. *In* (ed),  
650 Elsevier,
- 651 40. Ottolini D, Cali T, Szabò I, Brini M. 2017. Alpha-synuclein at the intracellular  
652 and the extracellular side: functional and dysfunctional implications.  
653 *Biological chemistry* 398:77-100.
- 654 41. Plotegher N, Berti G, Ferrari E, Tessari I, Zanetti M, Lunelli L, Greggio E,  
655 Bisaglia M, Veronesi M, Girotto S. 2017. DOPAL derived alpha-synuclein  
656 oligomers impair synaptic vesicles physiological function. *Scientific reports*  
657 7:1-16.
- 658 42. Masaracchia C, Hnida M, Gerhardt E, Lopes da Fonseca T, Villar-Pique A,  
659 Branco T, Stahlberg MA, Dean C, Fernández CO, Milosevic I. 2018. Membrane  
660 binding, internalization, and sorting of alpha-synuclein in the cell. *Acta*  
661 *neuropathologica communications* 6:1-17.
- 662 43. Pranke IM, Morello V, Bigay J, Gibson K, Verbavatz J-M, Antonny B, Jackson  
663 CL. 2011.  $\alpha$ -Synuclein and ALPS motifs are membrane curvature sensors  
664 whose contrasting chemistry mediates selective vesicle binding. *Journal of*  
665 *Cell Biology* 194:89-103.
- 666 44. Park S-C, Moon JC, Shin SY, Son H, Jung YJ, Kim N-H, Kim Y-M, Jang M-K, Lee  
667 JR. 2016. Functional characterization of alpha-synuclein protein with  
668 antimicrobial activity. *Biochemical and biophysical research communications*  
669 478:924-928.
- 670 45. Warren HS, Kania SA, Siber G. 1985. Binding and neutralization of bacterial  
671 lipopolysaccharide by colistin nonapeptide. *Antimicrobial agents and*  
672 *chemotherapy* 28:107-112.
- 673 46. Wiedemann I, Breukink E, van Kraaij C, Kuipers OP, Bierbaum G, de Kruijff B,  
674 Sahl H-G. 2001. Specific binding of nisin to the peptidoglycan precursor lipid  
675 II combines pore formation and inhibition of cell wall biosynthesis for potent  
676 antibiotic activity. *Journal of Biological Chemistry* 276:1772-1779.
- 677 47. Santos DE, Pol-Fachin L, Lins RD, Soares TA. 2017. Polymyxin binding to the  
678 bacterial outer membrane reveals cation displacement and increasing



- 679 membrane curvature in susceptible but not in resistant lipopolysaccharide  
680 chemotypes. *Journal of Chemical Information and Modeling* 57:2181-2193.
- 681 48. Lin J, Cheng J, Wang Y, Shen X. 2018. The *Pseudomonas* quinolone signal  
682 (PQS): not just for quorum sensing anymore. *Frontiers in cellular and*  
683 *infection microbiology* 8:230.
- 684 49. Cannatelli A, Giani T, Aiezza N, Di Pilato V, Principe L, Luzzaro F, Galeotti CL,  
685 Rossolini GM. 2017. An allelic variant of the PmrB sensor kinase responsible  
686 for colistin resistance in an *Escherichia coli* strain of clinical origin. *Scientific*  
687 *reports* 7:1-6.
- 688 50. Matsumoto Y, Hayama K, Sakakihara S, Nishino K, Noji H, Iino R, Yamaguchi  
689 A. 2011. Evaluation of multidrug efflux pump inhibitors by a new method  
690 using microfluidic channels. *PLoS One* 6:e18547.
- 691 51. Mashburn LM, Whiteley M. 2005. Membrane vesicles traffic signals and  
692 facilitate group activities in a prokaryote. *Nature* 437:422-425.
- 693 52. MacDonald IA, Kuehn MJ. 2012. Offense and defense: microbial membrane  
694 vesicles play both ways. *Research in microbiology* 163:607-618.
- 695 53. Mell JC, Redfield RJ. 2014. Natural competence and the evolution of DNA  
696 uptake specificity. *Journal of bacteriology* 196:1471-1483.
- 697 54. Seitz P, Blokesch M. 2013. Cues and regulatory pathways involved in natural  
698 competence and transformation in pathogenic and environmental Gram-  
699 negative bacteria. *FEMS microbiology reviews* 37:336-363.
- 700 55. Cabezón E, Ripoll-Rozada J, Peña A, De La Cruz F, Arechaga I. 2015. Towards  
701 an integrated model of bacterial conjugation. *FEMS microbiology reviews*  
702 39:81-95.
- 703 56. Tashiro Y, Hasegawa Y, Shintani M, Takaki K, Ohkuma M, Kimbara K,  
704 Futamata H. 2017. Interaction of bacterial membrane vesicles with specific  
705 species and their potential for delivery to target cells. *Frontiers in*  
706 *microbiology* 8:571.
- 707 57. Boto L. 2010. Horizontal gene transfer in evolution: facts and challenges.  
708 *Proceedings of the Royal Society B: Biological Sciences* 277:819-827.
- 709 58. Kloos D-U, Strätz M, Güttler A, Steffan RJ, Timmis KN. 1994. Inducible cell  
710 lysis system for the study of natural transformation and environmental fate  
711 of DNA released by cell death. *Journal of bacteriology* 176:7352-7361.
- 712 59. Bonnington KE, Kuehn MJ. 2016. Outer membrane vesicle production  
713 facilitates LPS remodeling and outer membrane maintenance in *Salmonella*  
714 during environmental transitions. *MBio* 7:e01532-16.
- 715 60. Schwechheimer C, Sullivan CJ, Kuehn MJ. 2013. Envelope control of outer  
716 membrane vesicle production in Gram-negative bacteria. *Biochemistry*  
717 52:3031-3040.
- 718 61. Bos J, Cisneros LH, Mazel D. 2021. Real-time tracking of bacterial membrane  
719 vesicles reveals enhanced membrane traffic upon antibiotic exposure.  
720 *Science advances* 7:eabd1033.
- 721 62. Kulp A, Kuehn MJ. 2010. Biological functions and biogenesis of secreted  
722 bacterial outer membrane vesicles. *Annual review of microbiology* 64:163-  
723 184.

- 724 63. Elhenawy W, Bording-Jorgensen M, Valguarnera E, Haurat MF, Wine E,  
725 Feldman MF. 2016. LPS remodeling triggers formation of outer membrane  
726 vesicles in Salmonella. *MBio* 7:e00940-16.
- 727 64. Mondal Roy S, Sarkar M. 2011. Membrane fusion induced by small molecules  
728 and ions. *Journal of lipids* 2011.
- 729 65. Bohuszewicz O, Liu J, Low HH. 2016. Membrane remodelling in bacteria.  
730 *Journal of structural biology* 196:3-14.
- 731 66. Brogden KA. 2005. Antimicrobial peptides: pore formers or metabolic  
732 inhibitors in bacteria? *Nature reviews microbiology* 3:238-250.
- 733 67. Linares JF, Gustafsson I, Baquero F, Martinez J. 2006. Antibiotics as  
734 intermicrobial signaling agents instead of weapons. *Proceedings of the*  
735 *National Academy of Sciences* 103:19484-19489.
- 736 68. Andersson DI, Hughes D. 2014. Microbiological effects of sublethal levels of  
737 antibiotics. *Nature Reviews Microbiology* 12:465-478.
- 738 69. Shun-Mei E, Zeng J-M, Yuan H, Lu Y, Cai R-X, Chen C. 2018. Sub-inhibitory  
739 concentrations of fluoroquinolones increase conjugation frequency.  
740 *Microbial pathogenesis* 114:57-62.
- 741 70. Wang Y, Kern SE, Newman DK. 2010. Endogenous phenazine antibiotics  
742 promote anaerobic survival of *Pseudomonas aeruginosa* via extracellular  
743 electron transfer. *Journal of bacteriology* 192:365-369.
- 744 71. Kadurugamuwa J, Beveridge T. 1997. Natural release of virulence factors in  
745 membrane vesicles by *Pseudomonas aeruginosa* and the effect of  
746 aminoglycoside antibiotics on their release. *The Journal of antimicrobial*  
747 *chemotherapy* 40:615-621.
- 748 72. Cooke AC, Nello AV, Ernst RK, Schertzer JW. 2019. Analysis of *Pseudomonas*  
749 *aeruginosa* biofilm membrane vesicles supports multiple mechanisms of  
750 biogenesis. *PloS one* 14:e0212275.
- 751 73. Nevot M, Deroncelé V, Messner P, Guinea J, Mercadé E. 2006.  
752 Characterization of outer membrane vesicles released by the psychrotolerant  
753 bacterium *Pseudoalteromonas antarctica* NF3. *Environmental microbiology*  
754 8:1523-1533.
- 755 74. Mulcahy LA, Pink RC, Carter DRF. 2014. Routes and mechanisms of  
756 extracellular vesicle uptake. *Journal of extracellular vesicles* 3:24641.
- 757 75. Nazarian P, Tran F, Boedicker JQ. 2018. Modeling multispecies gene flow  
758 dynamics reveals the unique roles of different horizontal gene transfer  
759 mechanisms. *Frontiers in microbiology*:2978.
- 760
